# Supplementary material for: Zc3h10 Acts as a Transcription Factor and Is Phosphorylated to Activate the Thermogenic Program
Source: PubMed Central journal article supplement — Cell Rep. Author manuscript; Available in PMC 2019 Dec 14. (PMC6911170; doi:10.1016/j.celrep.2019.10.099), 2019-11-26
Supplement: NIHMS1544708-supplement-1.pdf [file NIHMS1544708-supplement-1.pdf]

**Cell Reports, Volume 29**

**Supplemental Information**

**Zc3h10 Acts as a Transcription  
Factor and Is Phosphorylated  
to Activate the Thermogenic Program**

**Danielle Yi, Jon M. Dempersmier, Hai P. Nguyen, Jose A. Viscarra, Jennie Dinh, Chihiro Tabuchi, Yuhui Wang, and Hei Sook Sul**

**Figure S1.**

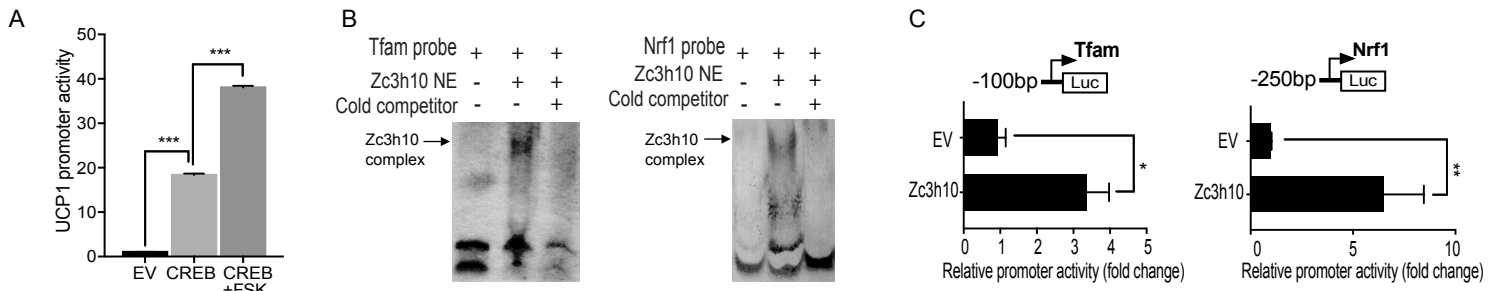

**Figure S1. Zc3h10 is required for full activation of BAT gene program. Related to Figure 1.**

(A) Luciferase activity in HEK293FT cells cotransfected with the -5.5 kb UCP1 promoter and indicated vector in the absence and presence of forskolin. (B) Gel shift assay performed with nuclear extracts HEK293FT cells transfected with Flag-Zc3h10 and oligos corresponding to the +50bp Tfam binding site and the -200bp Nrf1 binding site. (C) (Left) Luciferase activity in differentiated BAT cells cotransfected with the -100bp Tfam promoter and Zc3h10 (Right) Luciferase activity in differentiated BAT cells cotransfected with the -250bpNrf1 promoter and Zc3h10. (n=4).

**Figure S2.**

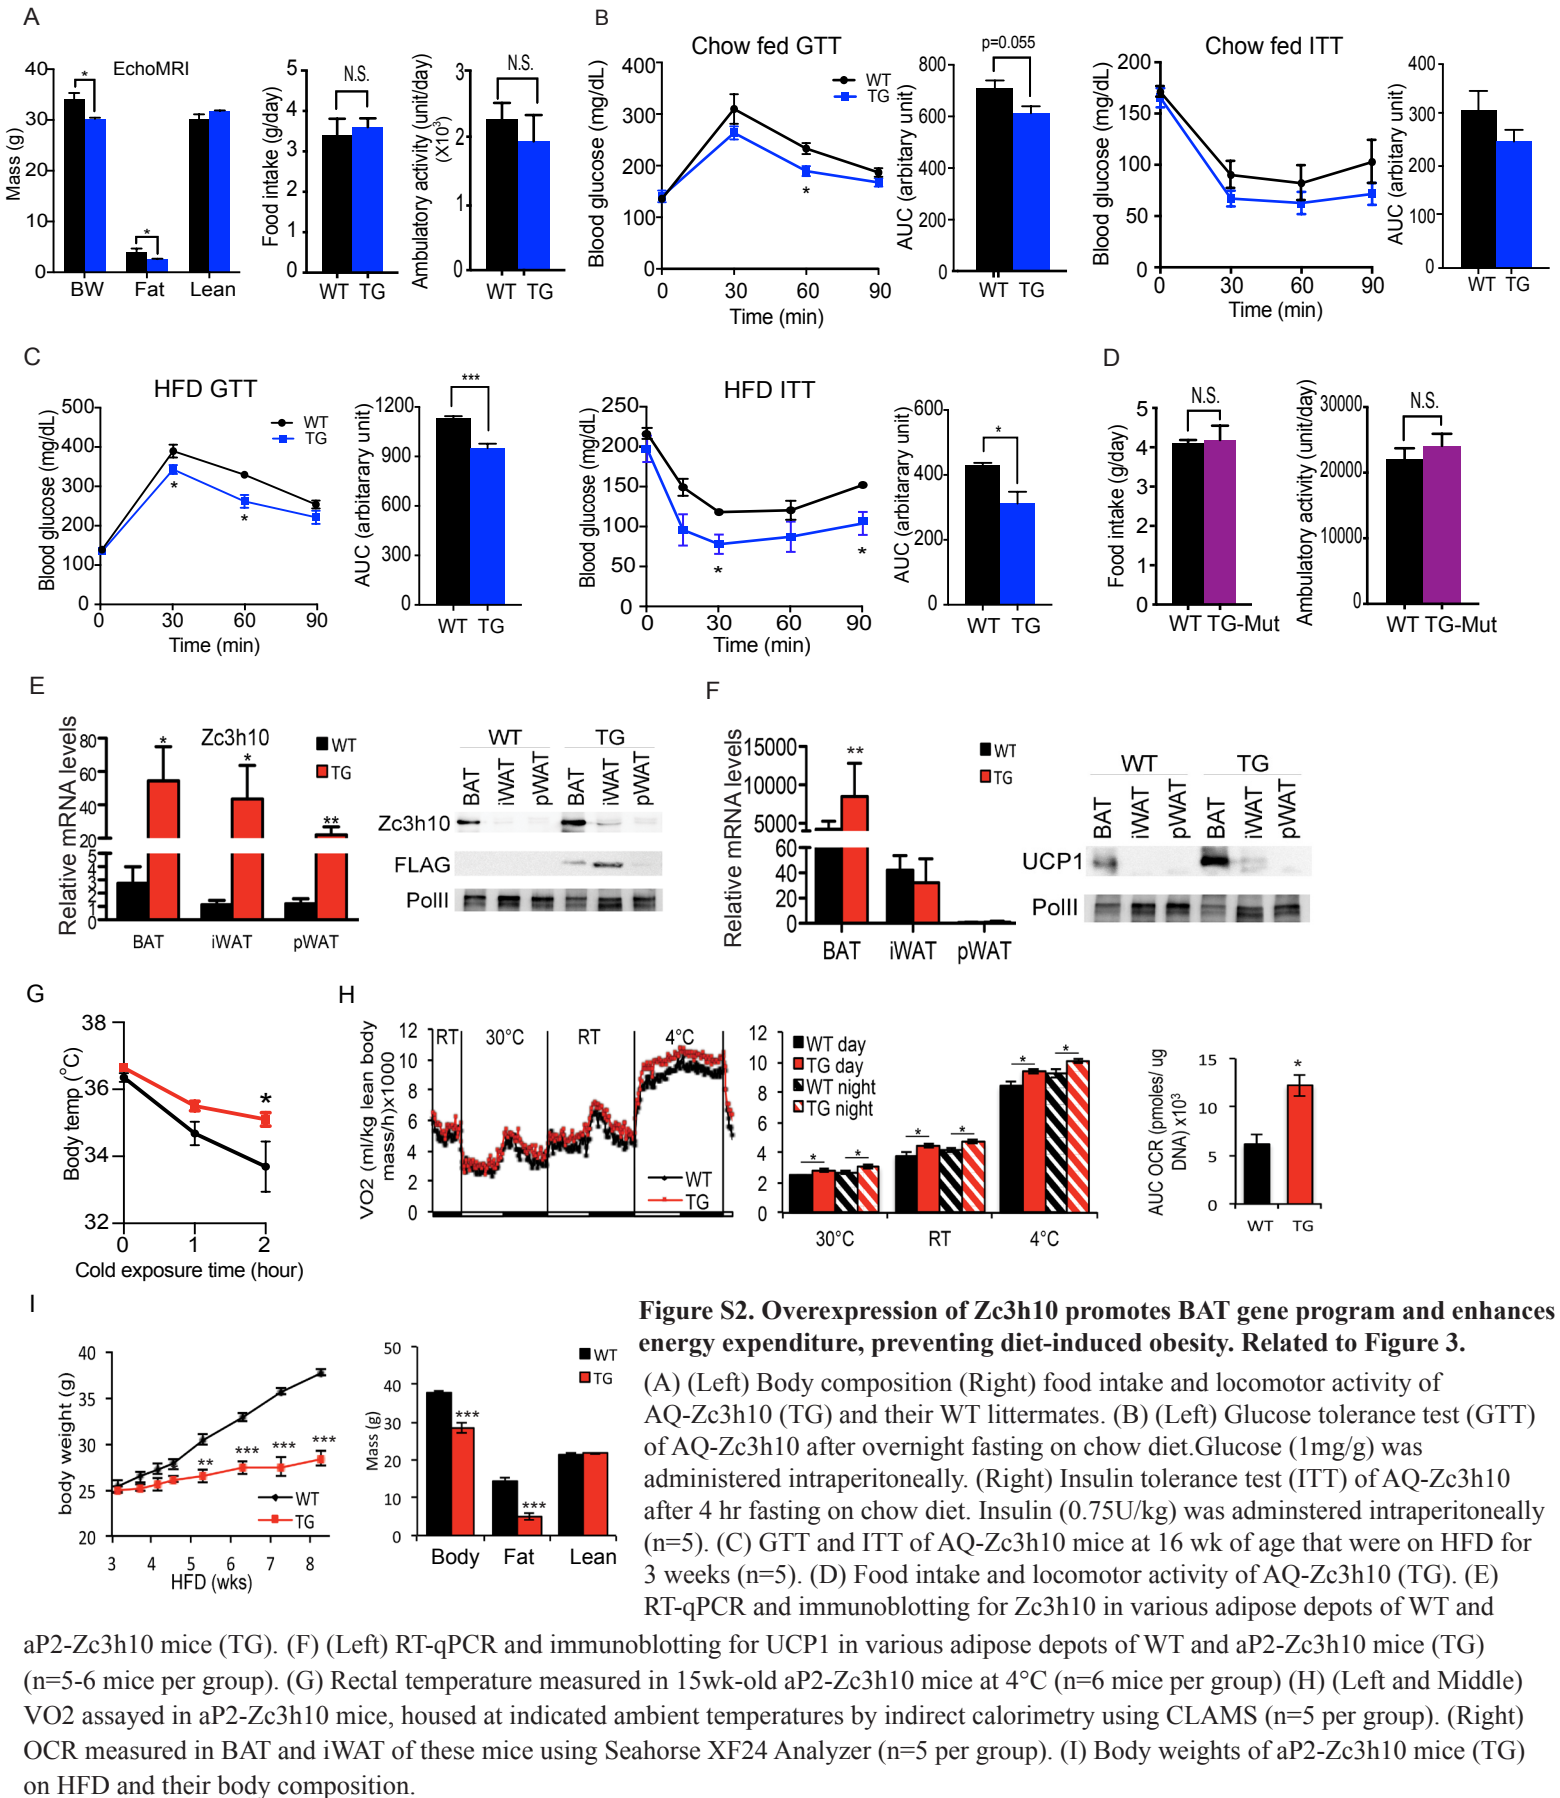

**Figure S2. Overexpression of Zc3h10 promotes BAT gene program and enhances energy expenditure, preventing diet-induced obesity. Related to Figure 3.**

(A) (Left) Body composition (Right) food intake and locomotor activity of AQ-Zc3h10 (TG) and their WT littermates. (B) (Left) Glucose tolerance test (GTT) of AQ-Zc3h10 after overnight fasting on chow diet. Glucose (1mg/g) was administered intraperitoneally. (Right) Insulin tolerance test (ITT) of AQ-Zc3h10 after 4 hr fasting on chow diet. Insulin (0.75U/kg) was administered intraperitoneally (n=5). (C) GTT and ITT of AQ-Zc3h10 mice at 16 wk of age that were on HFD for 3 weeks (n=5). (D) Food intake and locomotor activity of AQ-Zc3h10 (TG). (E) RT-qPCR and immunoblotting for Zc3h10 in various adipose depots of WT and aP2-Zc3h10 mice (TG).

(F) (Left) RT-qPCR and immunoblotting for UCP1 in various adipose depots of WT and aP2-Zc3h10 mice (TG) (n=5-6 mice per group). (G) Rectal temperature measured in 15wk-old aP2-Zc3h10 mice at 4°C (n=6 mice per group) (H) (Left and Middle) VO<sub>2</sub> assayed in aP2-Zc3h10 mice, housed at indicated ambient temperatures by indirect calorimetry using CLAMS (n=5 per group). (Right) OCR measured in BAT and iWAT of these mice using Seahorse XF24 Analyzer (n=5 per group). (I) Body weights of aP2-Zc3h10 mice (TG) on HFD and their body composition.

**Figure S3.**

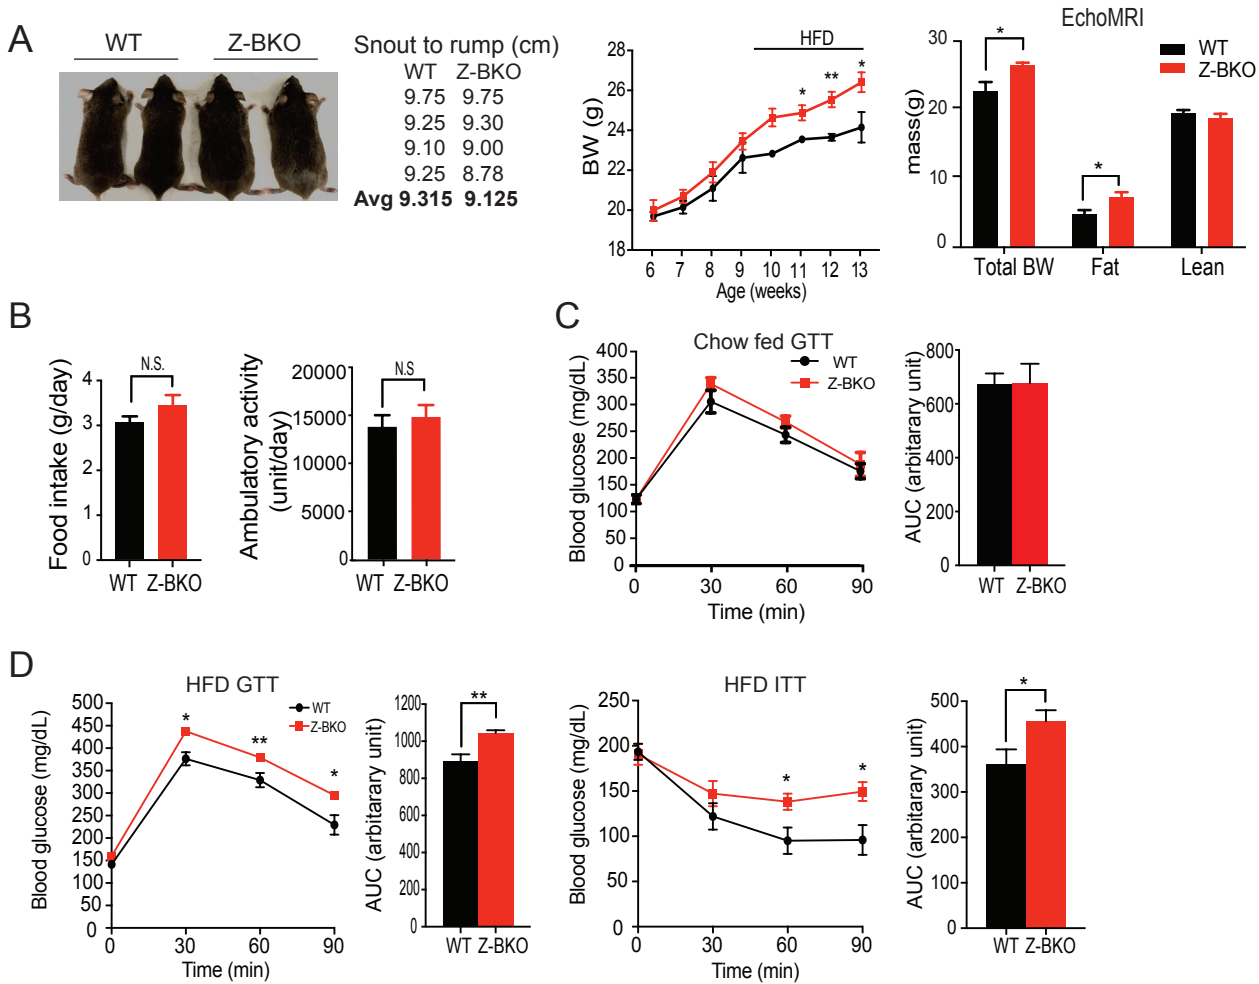

**Figure S3. Zc3h10 is required for full activation of BAT gene program. Related to Figure 4.**

(A) (Left) Representative image, body length measurements (Middle) body weight of 14wk old mice that were on HFD for 4 weeks (Right) EchoMRI of the mice. (B) Food intake and locomotor activity of Z-BKO and control littermates. (C) (Left) Glucose tolerance test of Z-BKO that were fasted overnight. Glucose (1mg/g) was administered intraperitoneally. (Right) Insulin tolerance test of Z-BKO on chow diet after 4 hr fasting. Insulin (0.75U/kg) was administered intraperitoneally (n=4). (D) (Left) Glucose tolerance test and (Right) insulin tolerance test of Z-BKO and control littermates on HFD (n=4).

## Figure S4.

A

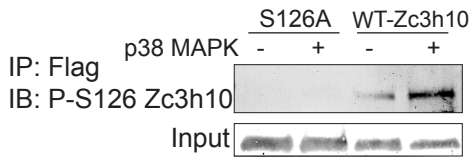

**Figure S4. Phosphorylation of Zc3h10-S126 by p38 MAPK for UCP1 transcription during cold exposure. Related to Figure 5.**

(A) Specificity of P-126 Zc3h10 antibody tested in lysates from HEK293 cells, transfected with either S126A or WT-Zc3h10 plasmids with or without p38 MAPK plasmid as indicated. IP with flag antibody followed by immunoblotting with P-126 Zc3h10.

**Table S1.** Primer sets for Rt-qPCR. Related to STAR Methods.

|                       | Forward primer                       | Reverse Primer                |
|-----------------------|--------------------------------------|-------------------------------|
| Zc3h10                | CGA CTA ATG CTG CAC CTC CT           | AGG AGT AGT GGT GTG GCT CA    |
| UCP1                  | ACT GCC ACA CCT CCA GTC ATT          | CTT TGC CTC ACT CAG GAT TGG   |
| Tfam                  | GTC CAT AGG CAC CGT ATT GC           | CCC ATG CTG GAA AAA CAC TT    |
| Nrf1                  | GAC AAG ATC ATC AAC CTG CCT GTA<br>G | GCT CAC TTC CTC CGG TCC TTT G |
| PGC1a                 | CCC TGC CAT TGT TAA GAC C            | TGC TGC TGT TCC TGT TTT C     |
| PPARg                 | GTG CCA GTT TCG ATC CGT AGA          | GGC CAG CAT CGT GTA GAT GA    |
| 18s                   | AGT CCC TGC CCT TTG TAC ACA          | CGA TCC GAG GGC CTC ACT A     |
| -4.6kb UCP1<br>ChIP   | CTC AGA GTG CAA CCC CTC AC           | GAG GTC GCA GAT CTG TTC CA    |
| -2.5kb UCP1<br>ChIP   | AGC GGTC ACA GAG GGT CAG T           | GTG AGG CTG GAT CCC CAG A     |
| Intron 2 UCP1<br>ChIP | TGA CAT TCA GGG CAG ACA GAG          | TCG AGT CGC TGT ATG GGT AG    |
| -200 Nrf1<br>ChIP     | CTC GGG CCG ACG AAT GAT G            | CGG GCT TCC CAC AGT ACC C     |
| +50 Tfam<br>ChIP      | GGT CCA ATC AGA TAG CCG GG           | CCT CAC TCA TTG GTG GGT CC    |

**Table S2.** Oligos for gel shift assays. Related to STAR Methods.

|      |                                                                                                                     |
|------|---------------------------------------------------------------------------------------------------------------------|
| Tfam | 5'-GGC CCG GCG CCG TCC GGT TCG TCT CAC GCA ATA CGG TGC CTA TGG ACT<br>GCC ACA CTA CCA GCG TGG GAA CTC CGG GGG CT-3' |
| Nrf1 | 5'-CTC AGC CGG TTG CCC TCC TGG TCC GGG CCC CGG CCA GCG CTG CCG AGC<br>CGC ACC AGA GGC CGA CGA GGC GGC CGG GGG TC-3' |
